# Supplementary material for: Genomic evidence for the degradation of terrestrial organic matter by pelagic Arctic Ocean Chloroflexi bacteria
Source: PubMed Central journal article supplement (PMC6123686; doi:10.1038/s42003-018-0086-7), 2018-07-05
Supplement: 42003_2018_86_MOESM1_ESM.pdf [file 42003_2018_86_MOESM1_ESM.pdf]

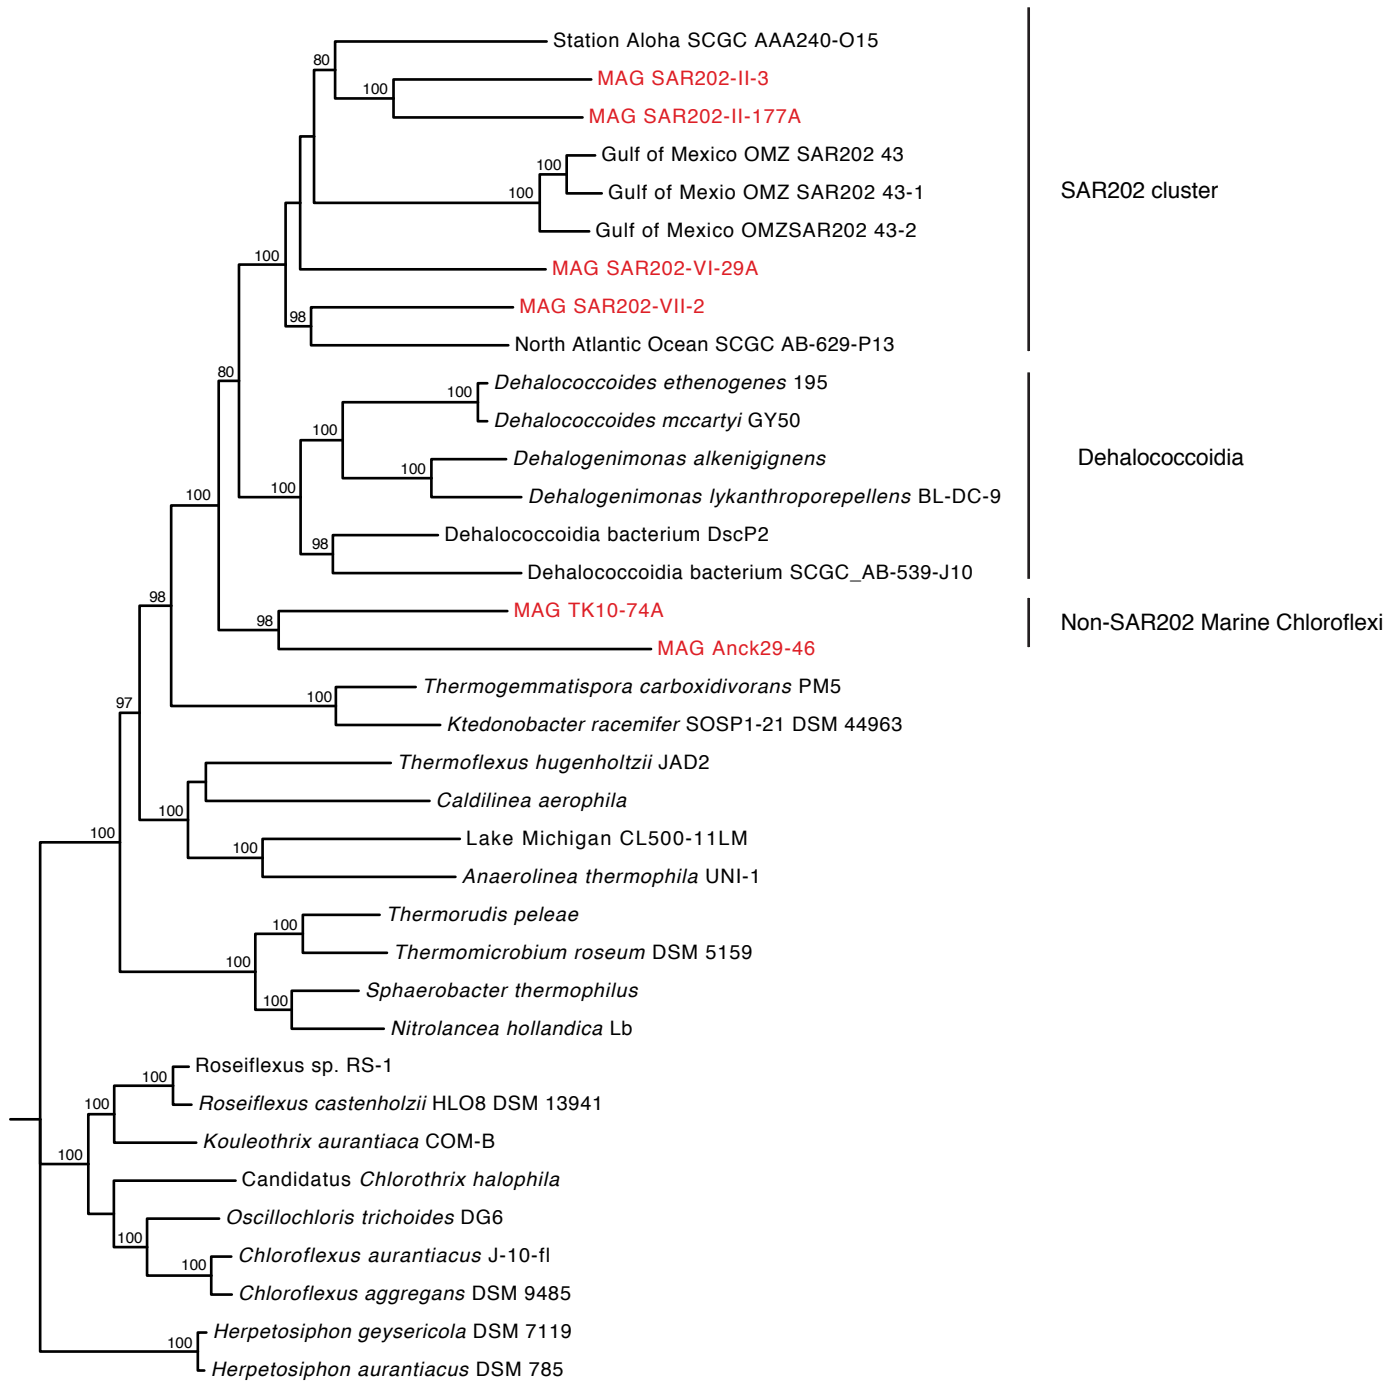

**Supplementary figure 1. A concatenated protein phylogeny of Chloroflexi genomes including 30 Chloroflexi reference genomes and the 6 Canada Basin Chloroflexi MAGs.**

This is a maximum likelihood tree based on concatenated sequence alignment of fifty amino acid sequences (representing of 14,815 amino acid positions), present in at least 34 of the 36 Chloroflexi genomes. Bootstrap values are based on 100 replicates.

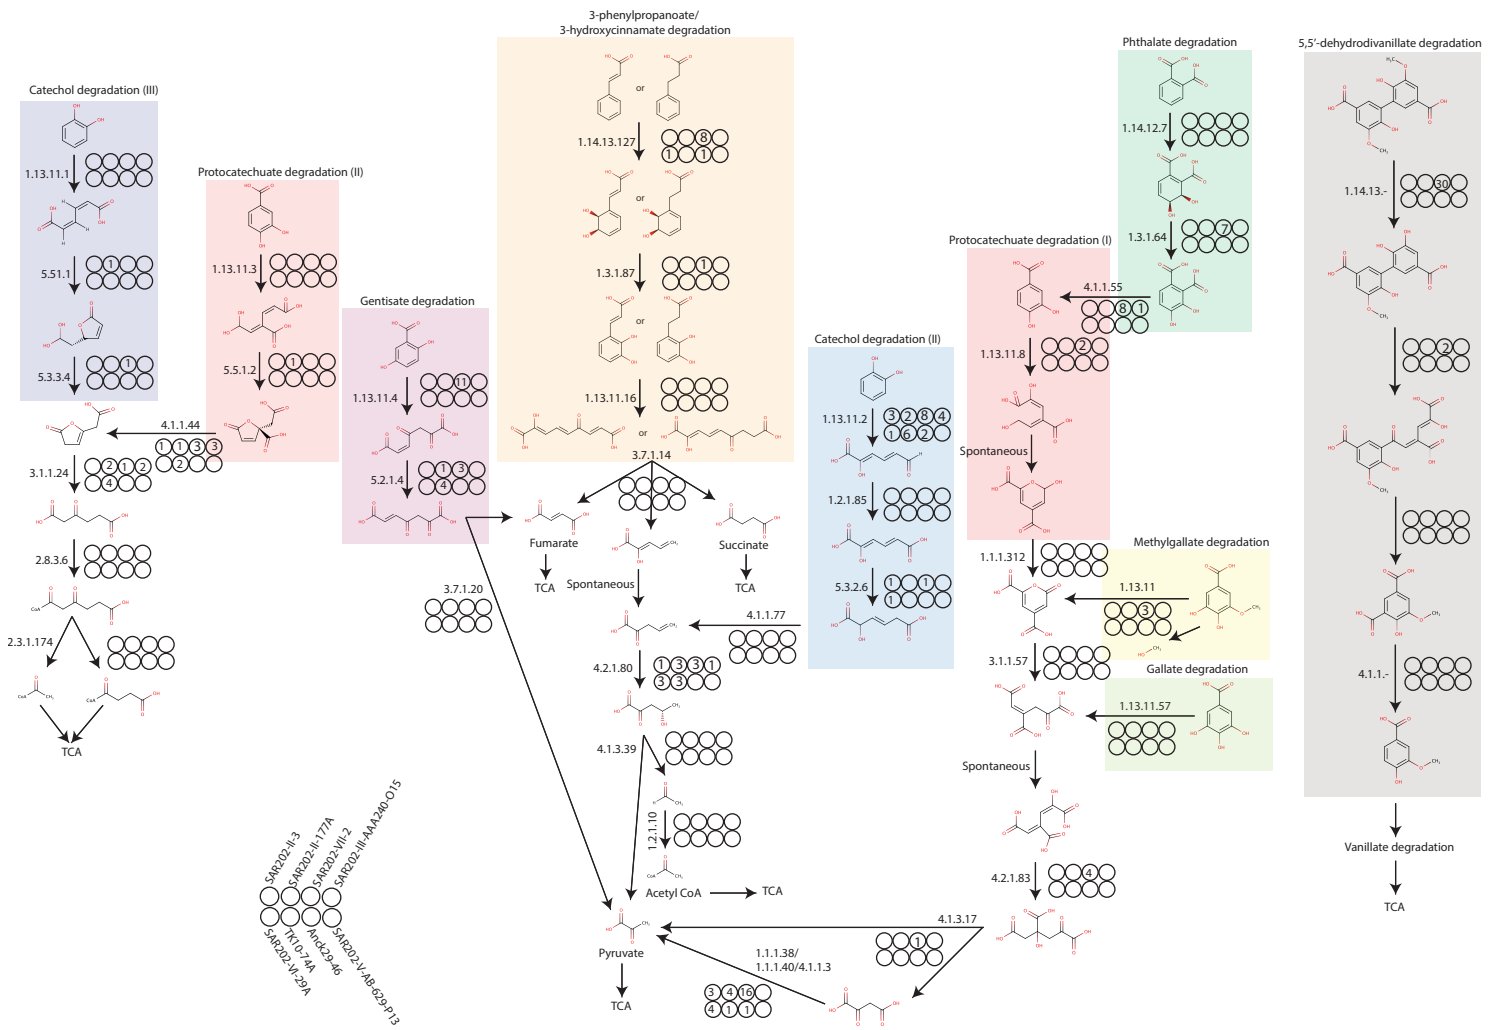

**Supplementary figure 2. Aromatic compound degradation pathways identified in the Arctic Ocean and deep ocean Chloroflexi genomes.** Circles represent the six Arctic Ocean MAGs and two deep ocean SAGs. The values in the circles represent the number of homologs identified in each respective genome. These reference metabolic pathways from MetaCyc were populated with proteins based on functional annotations available at the Integrated Microbial Genomes database.

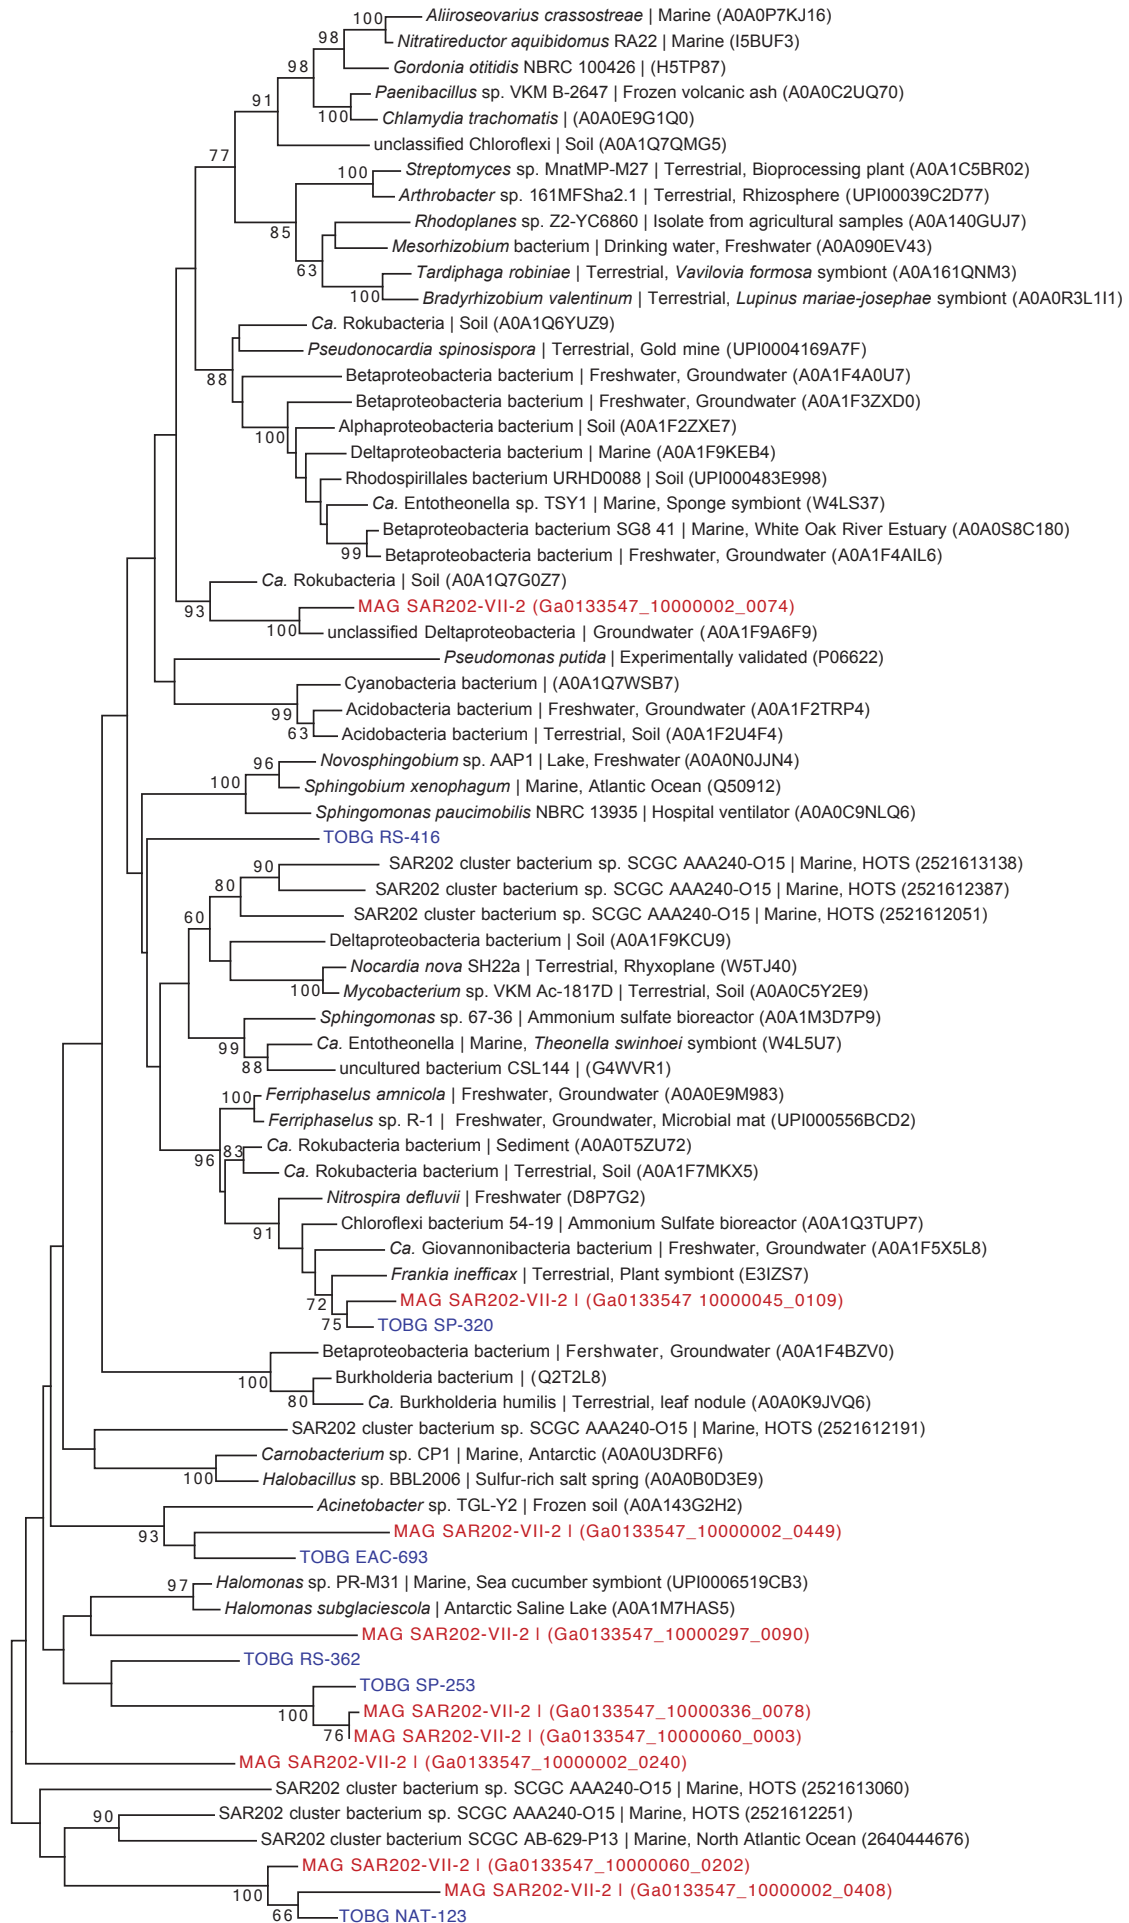

0.50

**Supplementary figure 3. Phylogenetic analysis of predicted catechol 2,3-dioxygenase (pfam 00903) protein sequences identified in SAR202-VII-2 .** This is a maximum likelihood tree based the alignment of catechol 2,3-dioxygenase sequences identified in SAR202-VII-2, UniRef90 sequences and Chloroflexi MAGs constructed from the TARA Oceans dataset. Bootstrap values of >60% are shown (100 replicates). SAR202-VII-2 sequences are shown in red while sequences originating from the TARA Oceans MAGs are shown in blue.

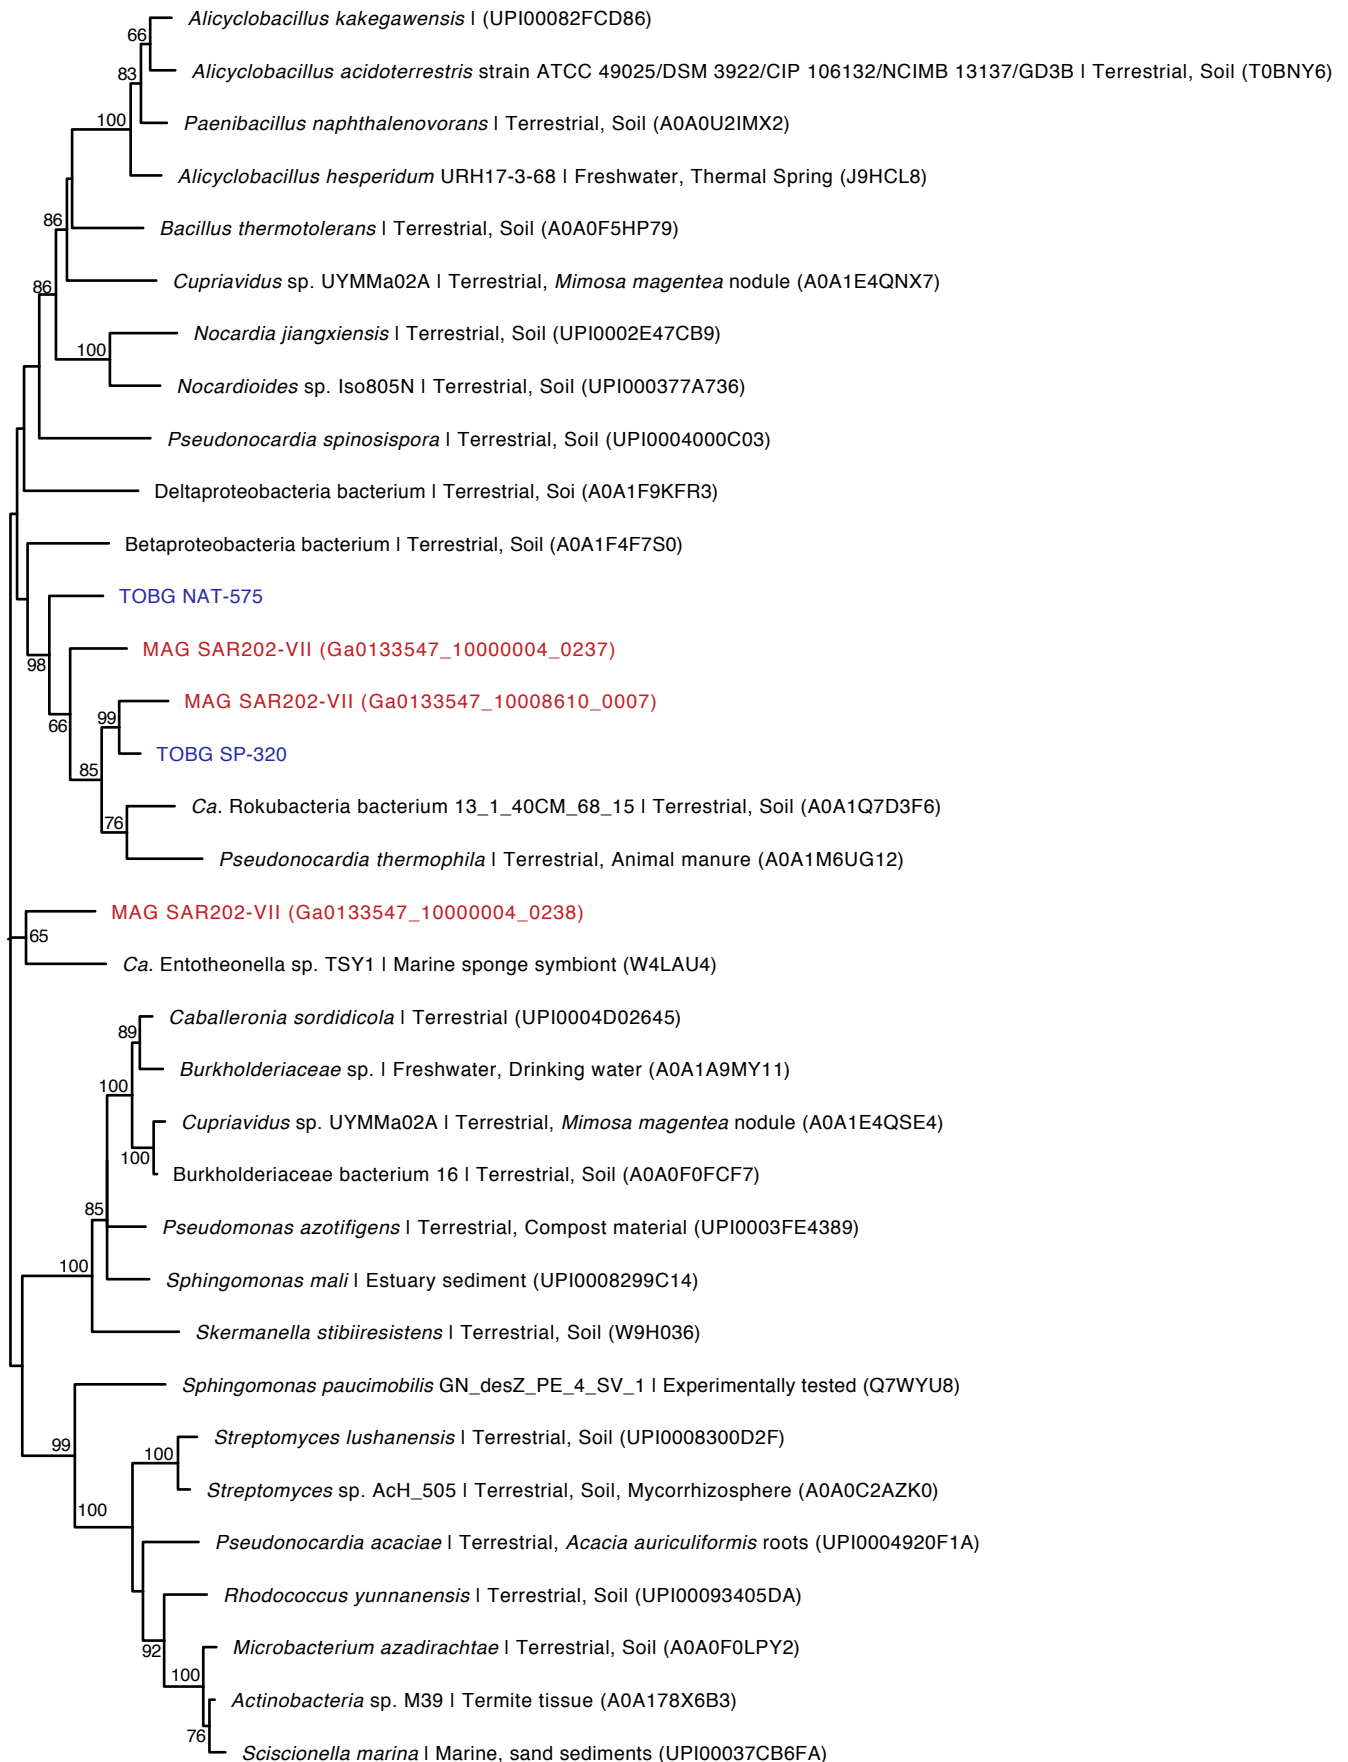

**Supplementary figure 4. Phylogenetic analysis of predicted 3-O-methylgallate dioxygenase pfam 02900) protein sequences identified in SAR202-VII-2. Method and description as described in Supplementary figure 2.**



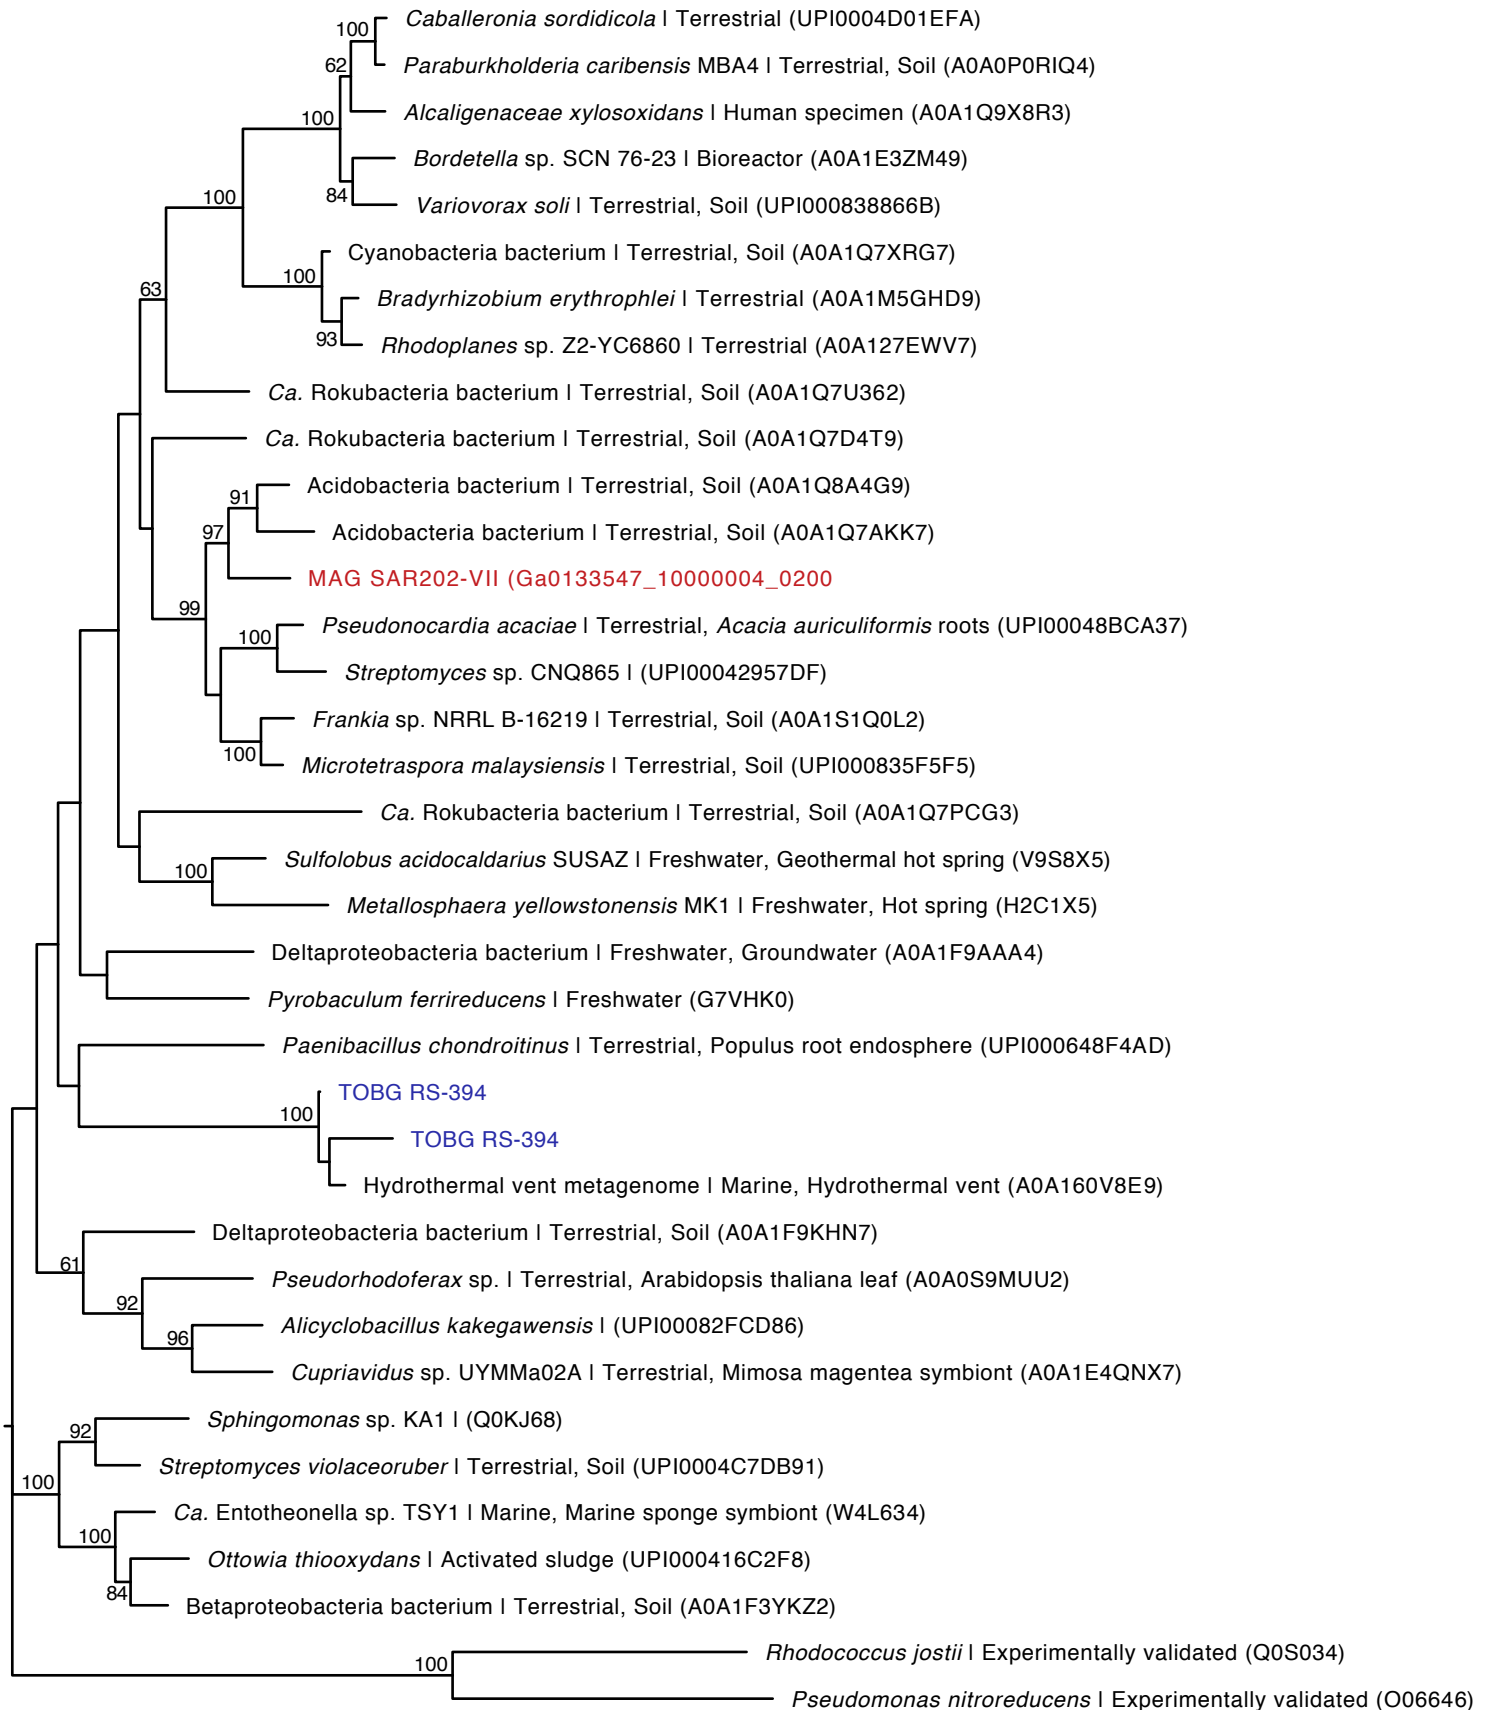

**Supplementary figure 5. Phylogenetic analysis of a predicted merged LigA/LigB fusion protein sequence identified in SAR202-VII-2.** Method and description as described in Supplementary figure 2.

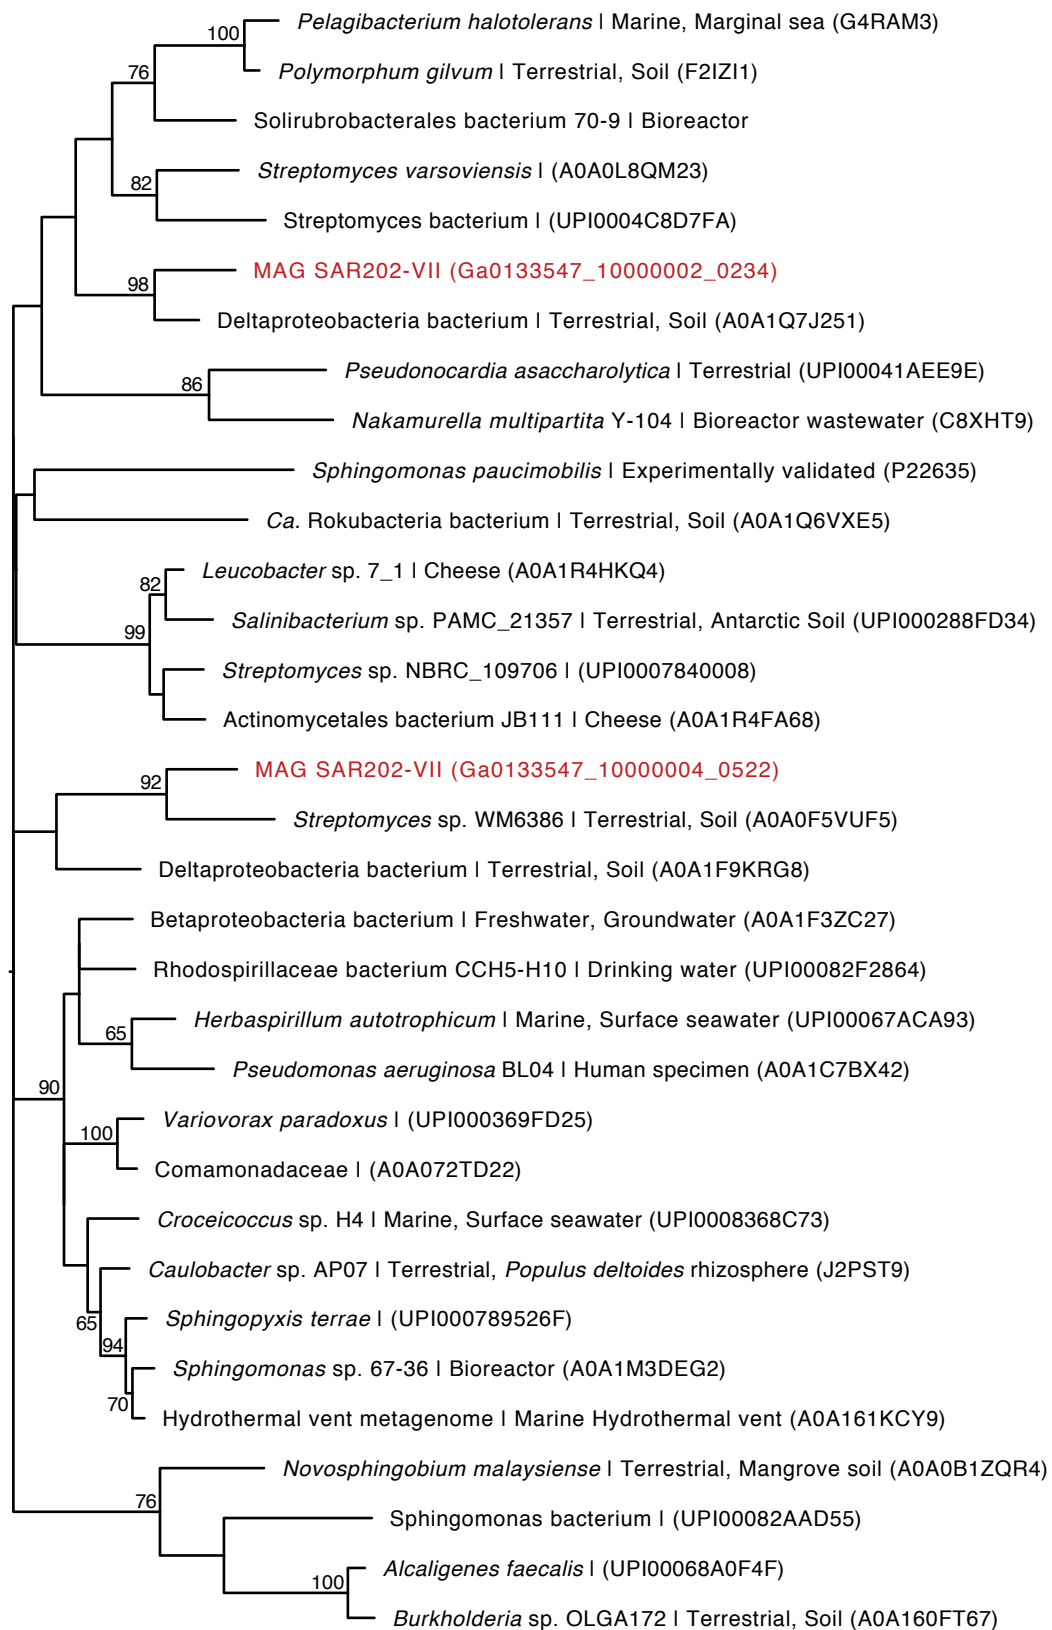

**Supplementary figure 6. Phylogenetic analysis of predicted LigA dioxygenase (pfam 07746) protein sequences identified in SAR202-VII-2.** Method and description as described in Supplementary figure 2.

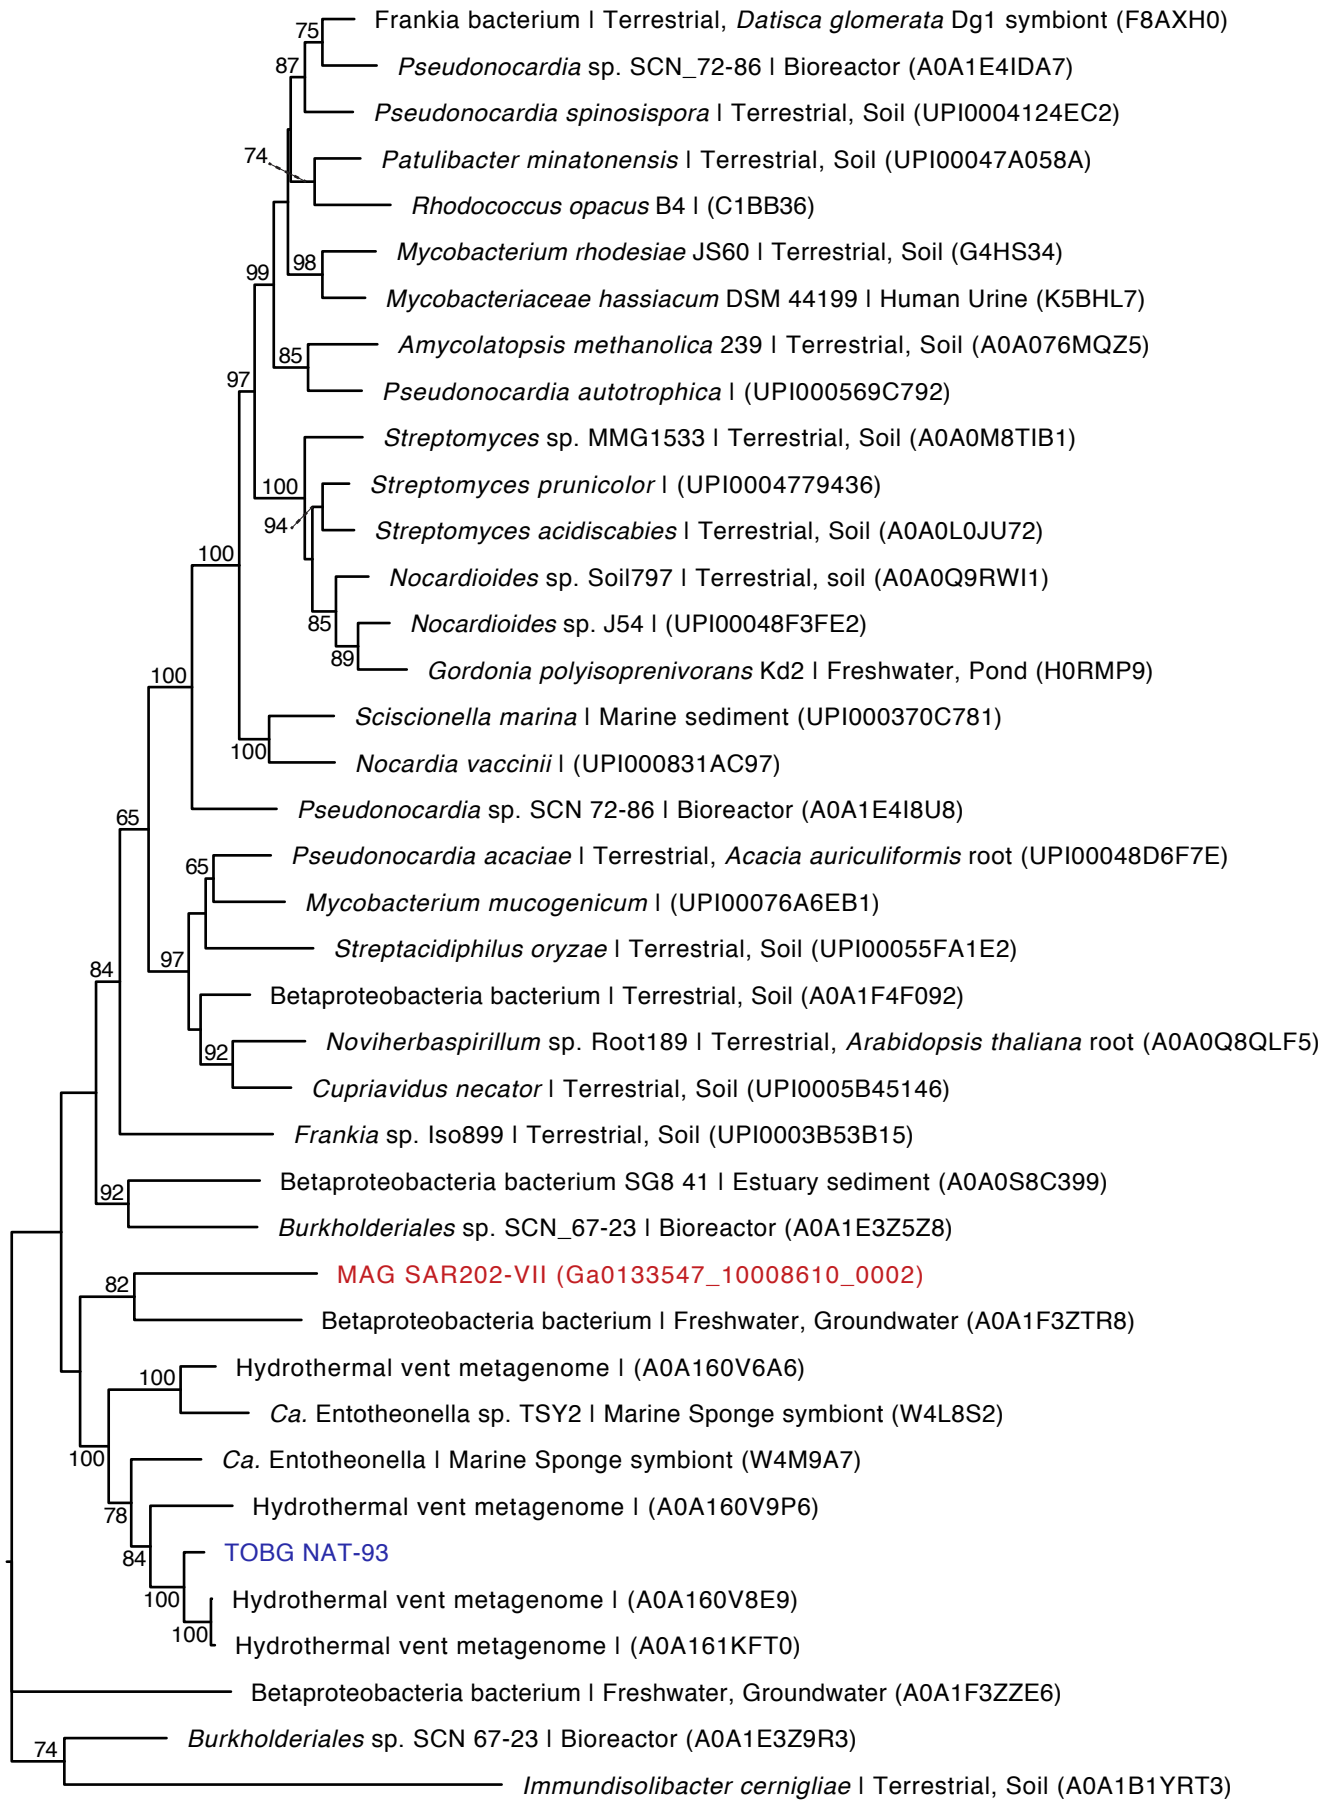

**Supplementary figure 7. Phylogenetic analysis of a predicted LigB dioxygenase (pfam 02900) protein sequence identified in SAR202-VII-2 (Ga0133547\_100086102). Method and description as described in Supplementary figure 2.**

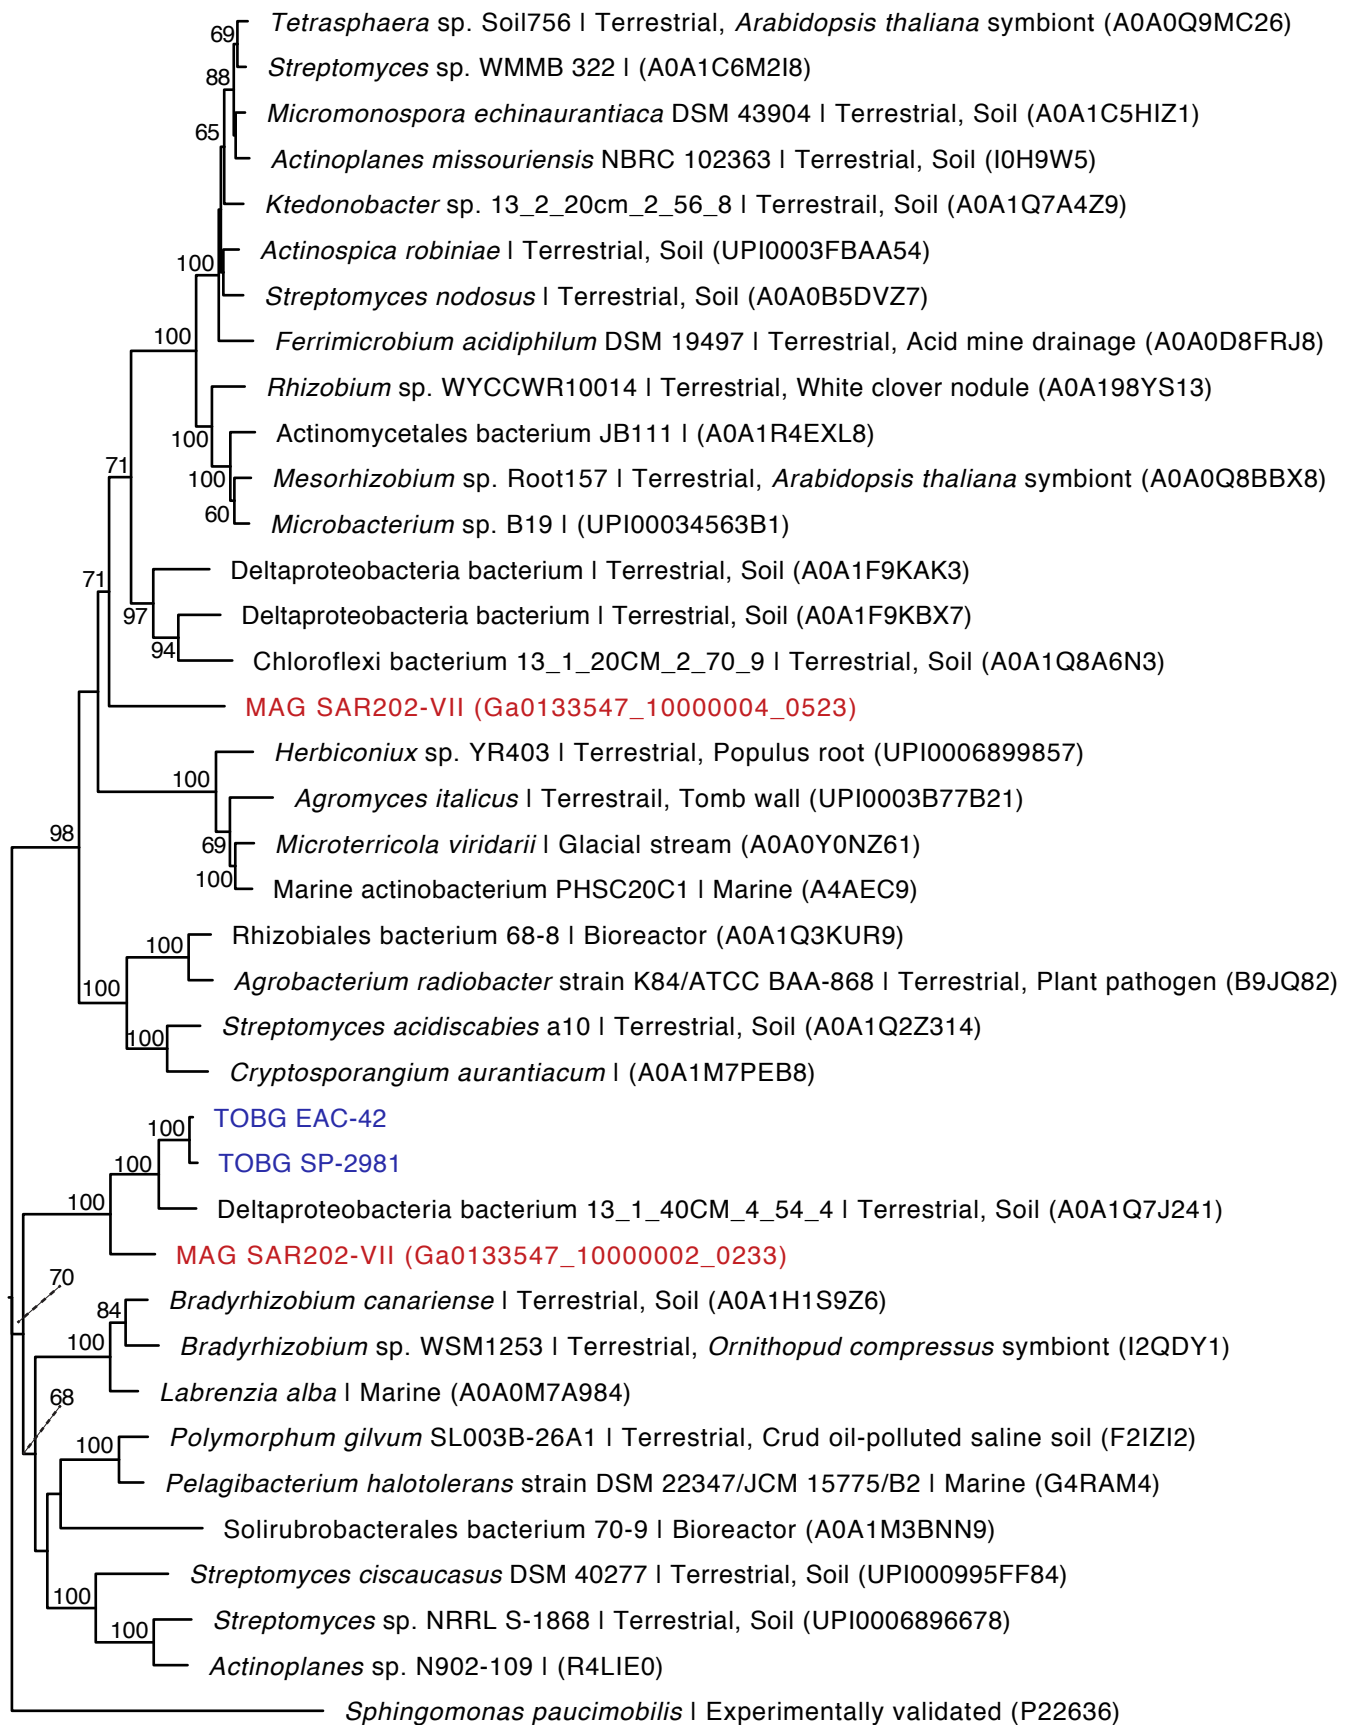

**Supplementary figure 8. Phylogenetic analysis of predicted beta subunits of the protocatechuate 4,5-dioxygenase (pfam 02900) protein sequences identified in SAR202-VII-2 (Ga0133547\_100086102). Method and description as described in Supplementary figure 2.**
